# Supplementary material
Source: MDPI journal article supplement (https://www.mdpi.com/2075-163X/11/2/190)
Supplement: s1 [file s1]

## Supplementary Figures

### Gold in Oxidized Ores of the Olympiada Deposit (Eastern Siberia, Russia)

Sergey A. Silyanov, Anatoly M. Sazonov, Yelena A. Zvyagina, Andrey A. Savichev  
and Boris M. Lobastov

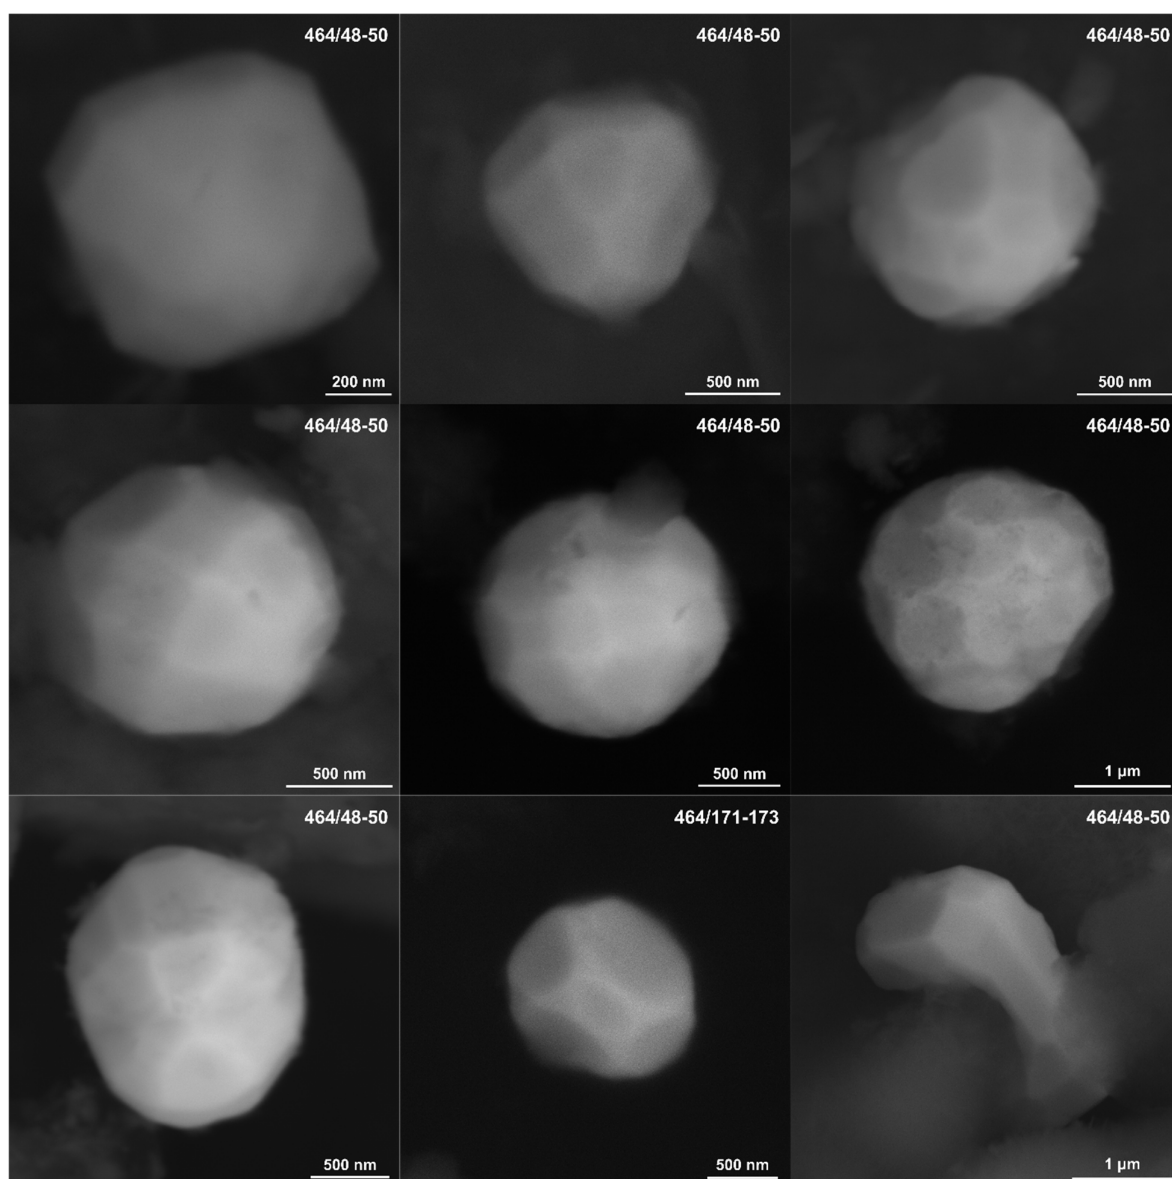

Figure S1. Morphology of native gold in oxidized ores: crystals

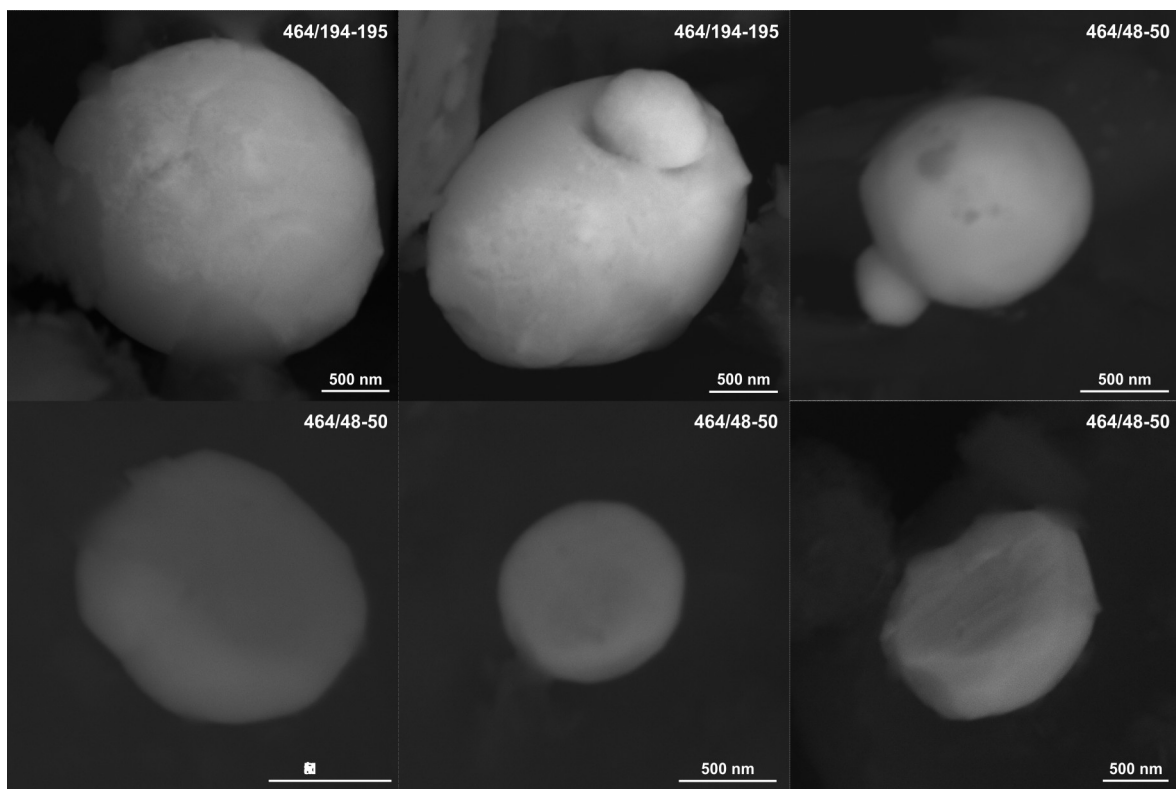

Figure S2. Morphology of native gold in oxidized ores: globular and disc-shaped gold

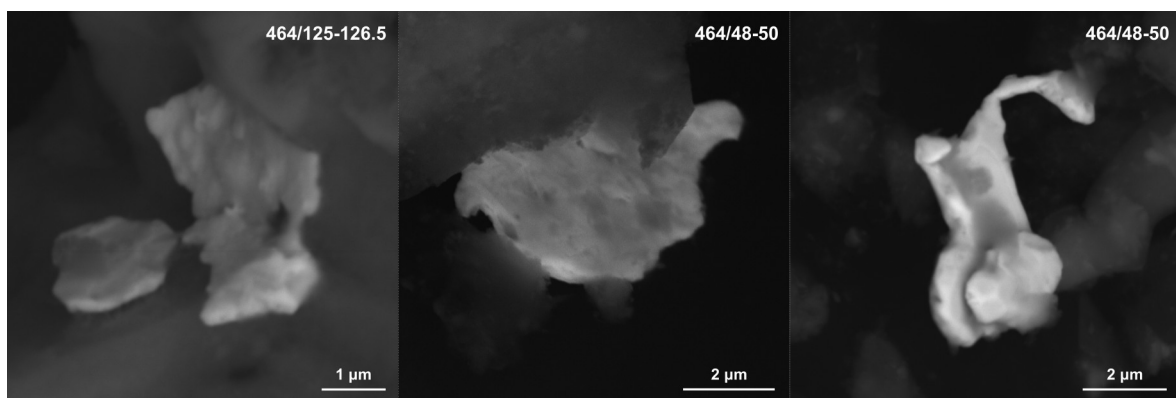

Figure S3. Morphology of native gold in oxidized ores: relic gold

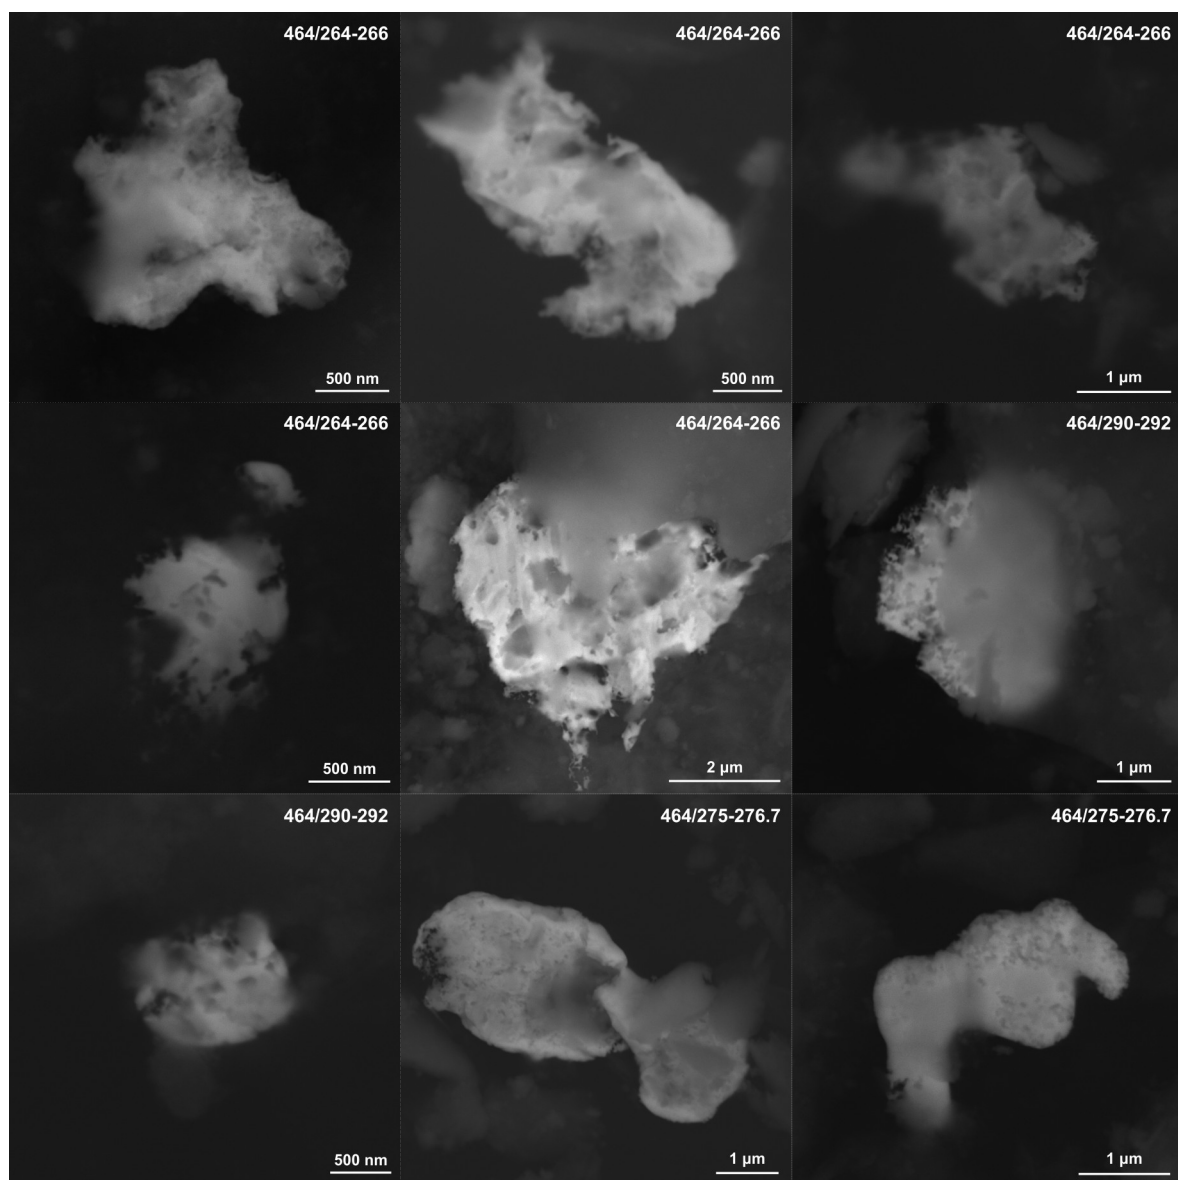

Figure S4. Morphology of native gold in oxidized ores: spongiiform gold

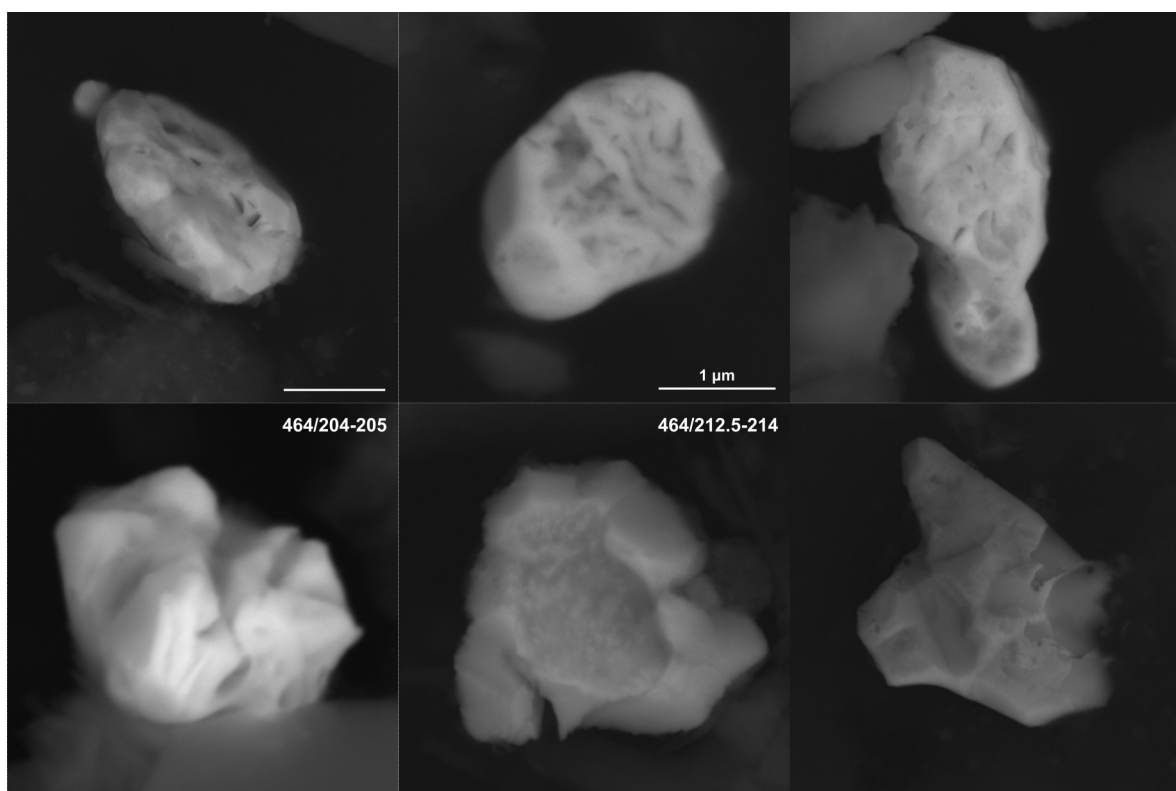

Figure S5. Morphology of native gold in oxidized ores: gold of irregular morphology
